# Supplementary material for: Pregnane X Receptor and Yin Yang 1 Contribute to the Differential Tissue Expression and Induction of CYP3A5 and CYP3A4
Source: PubMed Central journal article supplement (PMC3264657; doi:10.1371/journal.pone.0030895), 2012-01-23
Supplement: pone.0030895.s004.pdf [file pone.0030895.s004.pdf]

| Number | Primer name                | Sequence (5' to 3')                                             |
|--------|----------------------------|-----------------------------------------------------------------|
| 1      | CYP3A370-Fw                | GGCAGCCATGGAGGGGCAGGTGAGAGG                                     |
| 2      | CYP3A370-Rv                | ATGGGCGCCGGGCCTTTCTTTATG                                        |
| 3      | CYP3A5 <sub>5.4</sub> -Fw  | CACAACATATCACAAACGCGTTGCGAAACC                                  |
| 4      | CYP3A5 <sub>5.4</sub> -Rev | CCTCTCACCTGCCCCTCCATGGCTGCC                                     |
| 5      | CYP3A5 <sub>6.2</sub> -Fw  | GGCACAAAATGTATCCTAGGCTTATC                                      |
| 6      | CYP3A5 <sub>6.2</sub> -Rev | GTGAGATGAACCCGGTACCTCAGATG                                      |
| 7      | CYP3A5-Fw                  | GCCACCCCTAGTTAGCACC                                             |
| 8      | cyp3a5-Rv                  | CTCGAACTCCTGACCTCAGG                                            |
| 9      | CYP3A5-57ins-Fw            | tgctactccaactgcaggcagagcacaggtggcccTGCTATTGGCTGCAGCTATAGCCCTGCC |
| 10     | CYP3A5-57ins-Rv            | aggcttctccaccttgaagttgGCAAAGAATCGCACACACCCCTTTGCTGACCTCTTTTGA   |
| 11     | CYP3A5-57SP-Fw             | cgaacgaacgaacgaacgaacgaacgaacTGCTATTGGCTGCAGCTATAGCCCTGCC       |
| 12     | CYP3A5-57SP-Rv             | ttcgctcgttcgctcgttcgctcgttcGCAAAGAATCGCACACACCCCTTTGCTGACC      |
| 13     | CYP3A4-57del/SPins-Fw      | cgaacgaacgaacgaacgaacgaacgaacTGCTACTGGCTGCAGCTCCAGCC            |
| 14     | CYP3A4-57del/SPins-Rv      | ttcgctcgttcgctcgttcgctcgttcAGTTGGCAAAGAATCACACACACACCACTC       |
| 15     | CYP3A4-57del-Fw            | TGCTACTGGCTGCAGCTCCAGCCCTGCCTCCTTCTCTAGC                        |
| 16     | CYP3A4-57del-Rv            | GTTGGCAAAGAATCACACACACACCACTCACTGACCTCC                         |

Nucleotides complementary to the respective promoter sequence are capitalized in each primer pair. Where appropriate, the circularization of the resulting PCR products by ligation was improved by 5' phosphorylation of oligonucleotides.
