# Supplementary material for: Pregnane X Receptor and Yin Yang 1 Contribute to the Differential Tissue Expression and Induction of CYP3A5 and CYP3A4
Source: PubMed Central journal article supplement (PMC3264657; doi:10.1371/journal.pone.0030895), 2012-01-23
Supplement: pone.0030895.s005.pdf [file pone.0030895.s005.pdf]

| Primer name                | Sequence (5' to 3')                            |
|----------------------------|------------------------------------------------|
| Canonical YY1 binding site | (C/g/a)(G/t)(C/t/a) <u>CATN</u> (T/a)(T/g/c)   |
| CYP3A5-57insM1/CYP3A4-M1   | GTTGGAAGAGGCTT <u>CTCCATCT</u> TGGAAGTTGGCAAAG |
| CYP3A5-57insM2             | GTTGGAAGAGGCTT <u>CTCAACCT</u> TGGAAGTTGGC     |
| CYP3A5-57insM3             | GGAAGAGGCTT <u>CTCCACCCT</u> GGAAGTTGG         |
| CYP3A5-57insM4             | GAGGCTT <u>CTCCACCGA</u> GGAAGTTGGCAAAG        |
| CYP3A5-57insM5             | GGAAGAGGCTT <u>CTCAGCCT</u> TGGAAGTTGGC        |
| CYP3A5-57insM6             | GGAAGAGGCTT <u>TTGCACCCT</u> GGAAGTTGG         |
| CYP3A5-57insM7/CYP3A4-M7   | GTTGGAAGAGGCTT <u>CTCAGCCGA</u> GGAAGTTGGCAAAG |

Nucleotides corresponding to the canonical YY1-binding site are underlined. Mutated nucleotides are shown in bold type.
